# Supplementary material for: Bumble bee parasite strains vary in resistance to phytochemicals
Source: PubMed Central journal article supplement (PMC5121629; doi:10.1038/srep37087), 2016-11-24
Supplement: srep37087-s1.pdf [file srep37087-s1.pdf]

## Supplementary Information

Bumble bee parasite strains vary in resistance to phytochemicals

Evan C. Palmer-Young, Ben M. Sadd, Philip C. Stevenson, Rebecca E. Irwin, Lynn S. Adler

**Supplementary Table S1. Details of field sampling.** Species and cultivars, locations, and dates of sampling.

| Species                             | Site                                           | Site GPS                         | Cultivars                                            | Inclusive dates of sampling |
|-------------------------------------|------------------------------------------------|----------------------------------|------------------------------------------------------|-----------------------------|
| <i>Persea americana</i>             | South Coast Research and Extension Center (CA) | 33°41'39.38"N<br>117°43'15.27"W  | BL516/Marvel, Hass, and 46-4918-99                   | 27 Feb - 4 March 2015       |
| <i>Malus domestica</i>              | Cold Spring Orchard                            | 42°15'6.73"N<br>72°21'38.99"W    | Macintosh, Honeycrisp, Fuji-Autumn Rose              | 13 - 18 May 2014            |
| <i>Prunus dulcis</i>                | Long Almond Orchard, Zamora, CA                | 38°49'25.88"N,<br>121°55'35.22"W | Nonpareil, Monterey and Winters                      | 18 Feb 2015                 |
| <i>Vaccinium corymbosum</i> (cult.) | Cold Spring Orchard                            | 42°15'6.73"N<br>72°21'38.99"W    | Liberty, Patriot, Reka, Northland, Friendship, Bonus | 19-27 May 2014              |
|                                     | Kenburn Orchard                                | 42°36'43.44"N<br>72°39'18.05"W   | Patriot                                              | 20-21 May 2014              |
|                                     | Sobieski's River Valley Farm                   | 42°27'12.72"N<br>72°35'43.02"W   | Spartan, Bluecrop                                    | 27 May 2014                 |
|                                     | Nourse Farm                                    | 42°25'49.45"N<br>72°35'18.92"W   | Spartan, Bluecrop                                    | 28 May 2014                 |
| <i>Vaccinium corymbosum</i> (wild)  | Quabbin Reservoir Gate 10                      | 42°23.537'N<br>72°24.181'W       | NA                                                   | 22 May 2014                 |
|                                     | Harvard Pond                                   | 42°29'54.93"N,<br>72°12'47.83"W  | NA                                                   | 23-25 May 2014              |
|                                     | Harvard Forest                                 | 42°32'6.41"N,<br>72°11'19.53"W   | NA                                                   | 26 May 2014                 |
| <i>Thymus vulgaris</i>              | S. Deerfield Farm                              | 42°28'45.53"N<br>72°34'46.06"W   | Silver                                               | 7 July 2015                 |
| <i>Thymus vulgaris</i>              | S. Deerfield Farm                              | 42°28'45.53"N<br>72°34'46.06"W   | German                                               | 12 June - 7 July 2015       |

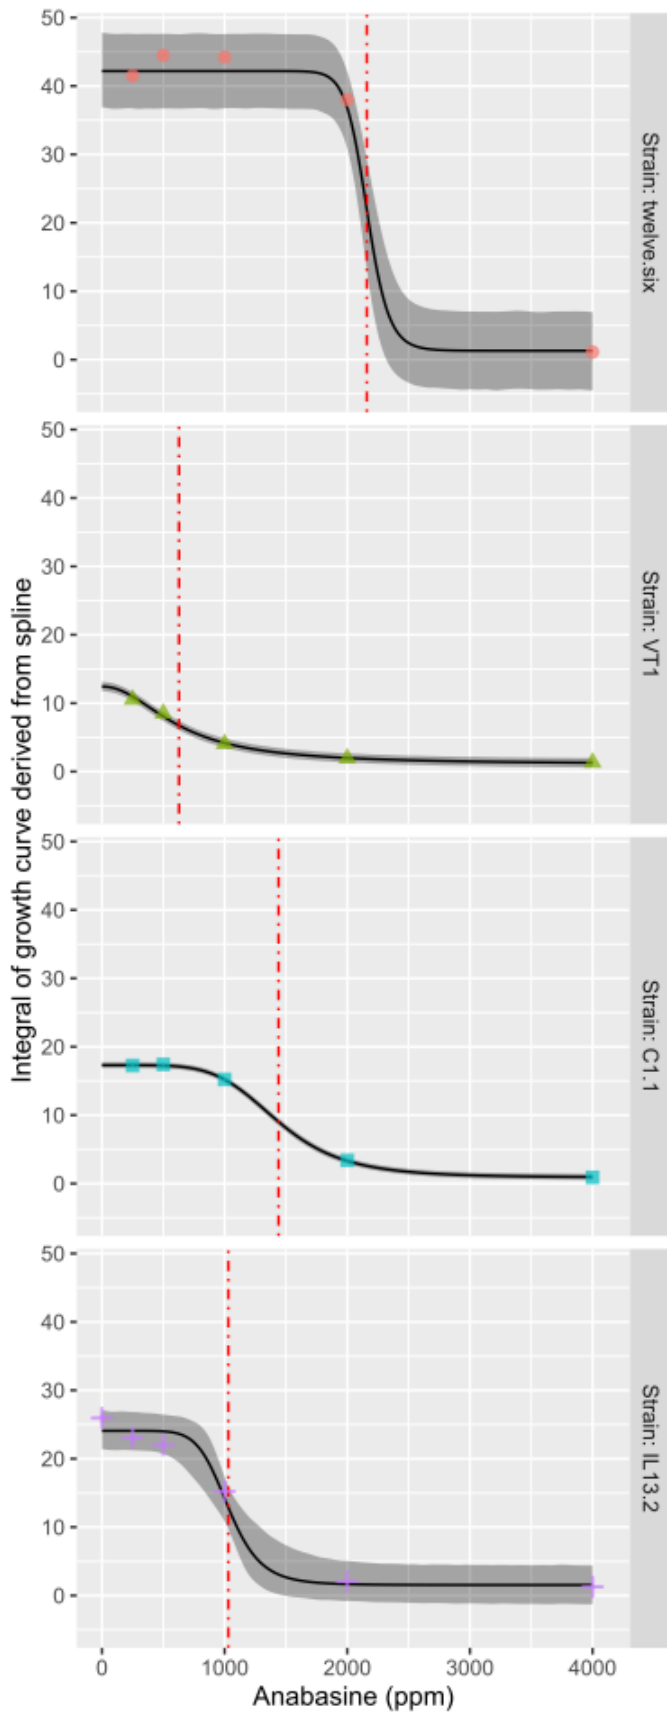

**Supplementary Figure S1: 95% posterior density bands for responses of 4 parasite strains to anabasine.** Points show raw data (mean +/- SD). Vertical lines indicate EC50 values.

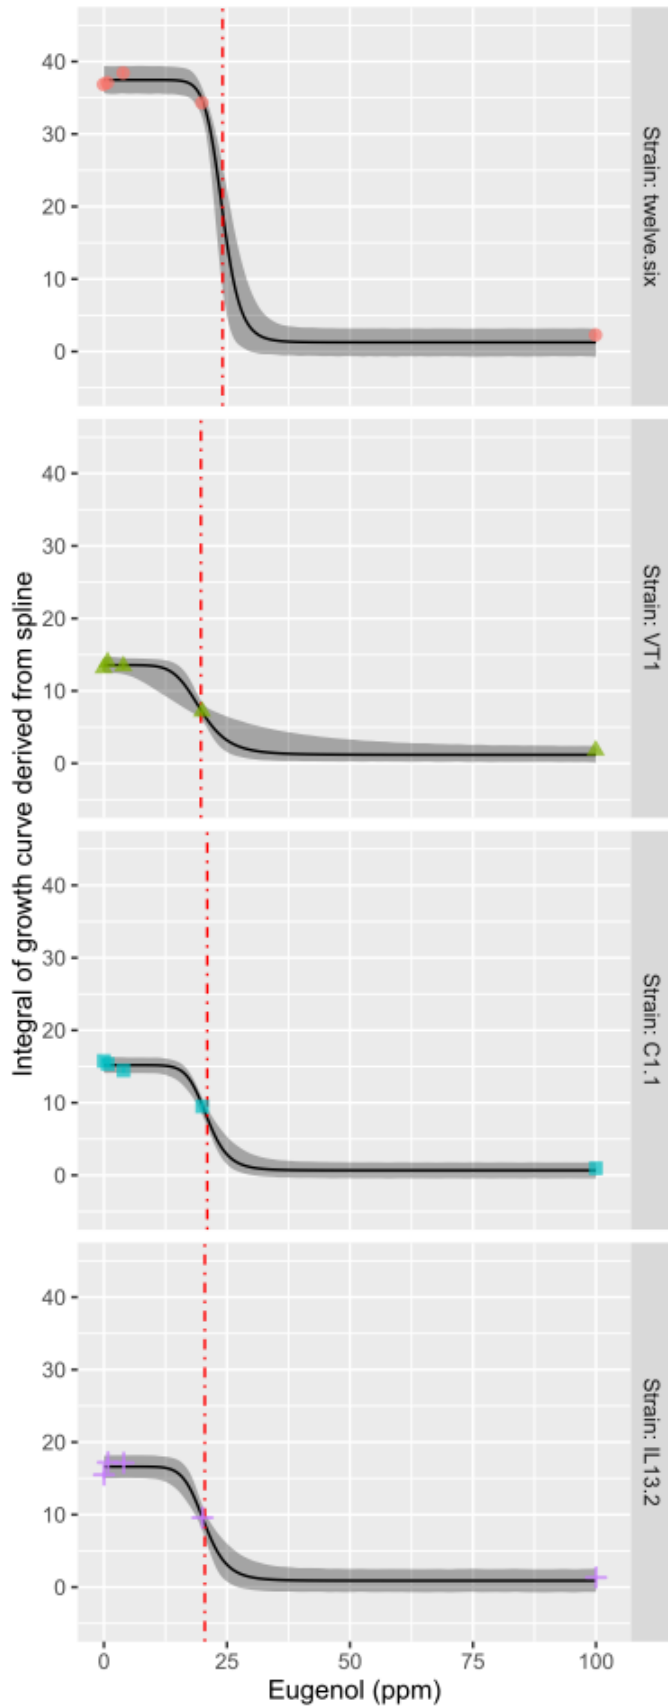

**Supplementary Figure S2: 95% posterior density bands for responses of 4 parasite strains to eugenol.**

Points show raw data (mean +/- SD). Vertical lines indicate EC50 values.

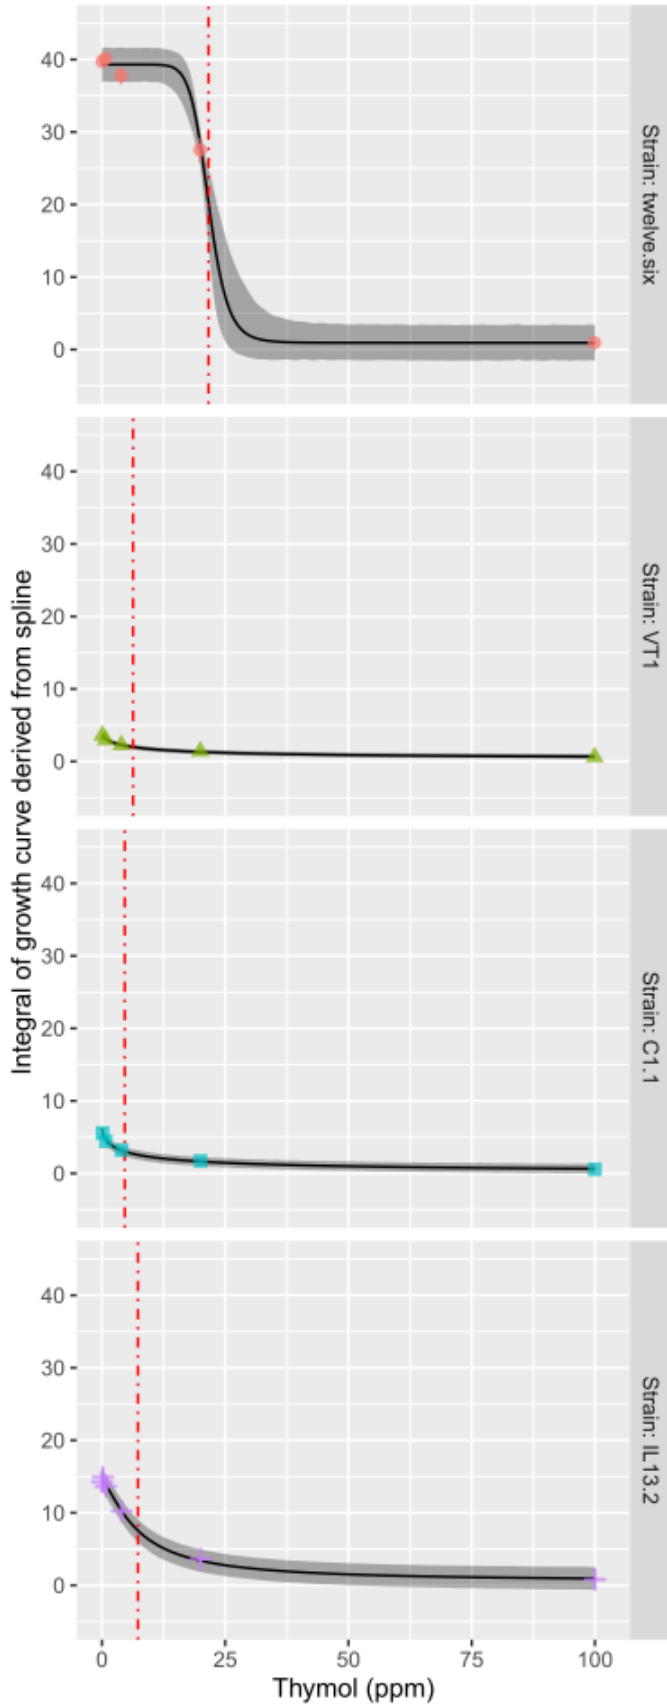

**Supplementary Figure S3: 95% posterior density bands for responses of 4 parasite strains to thymol.**

Points show raw data (mean  $\pm$  SD). Vertical lines indicate EC50 values.

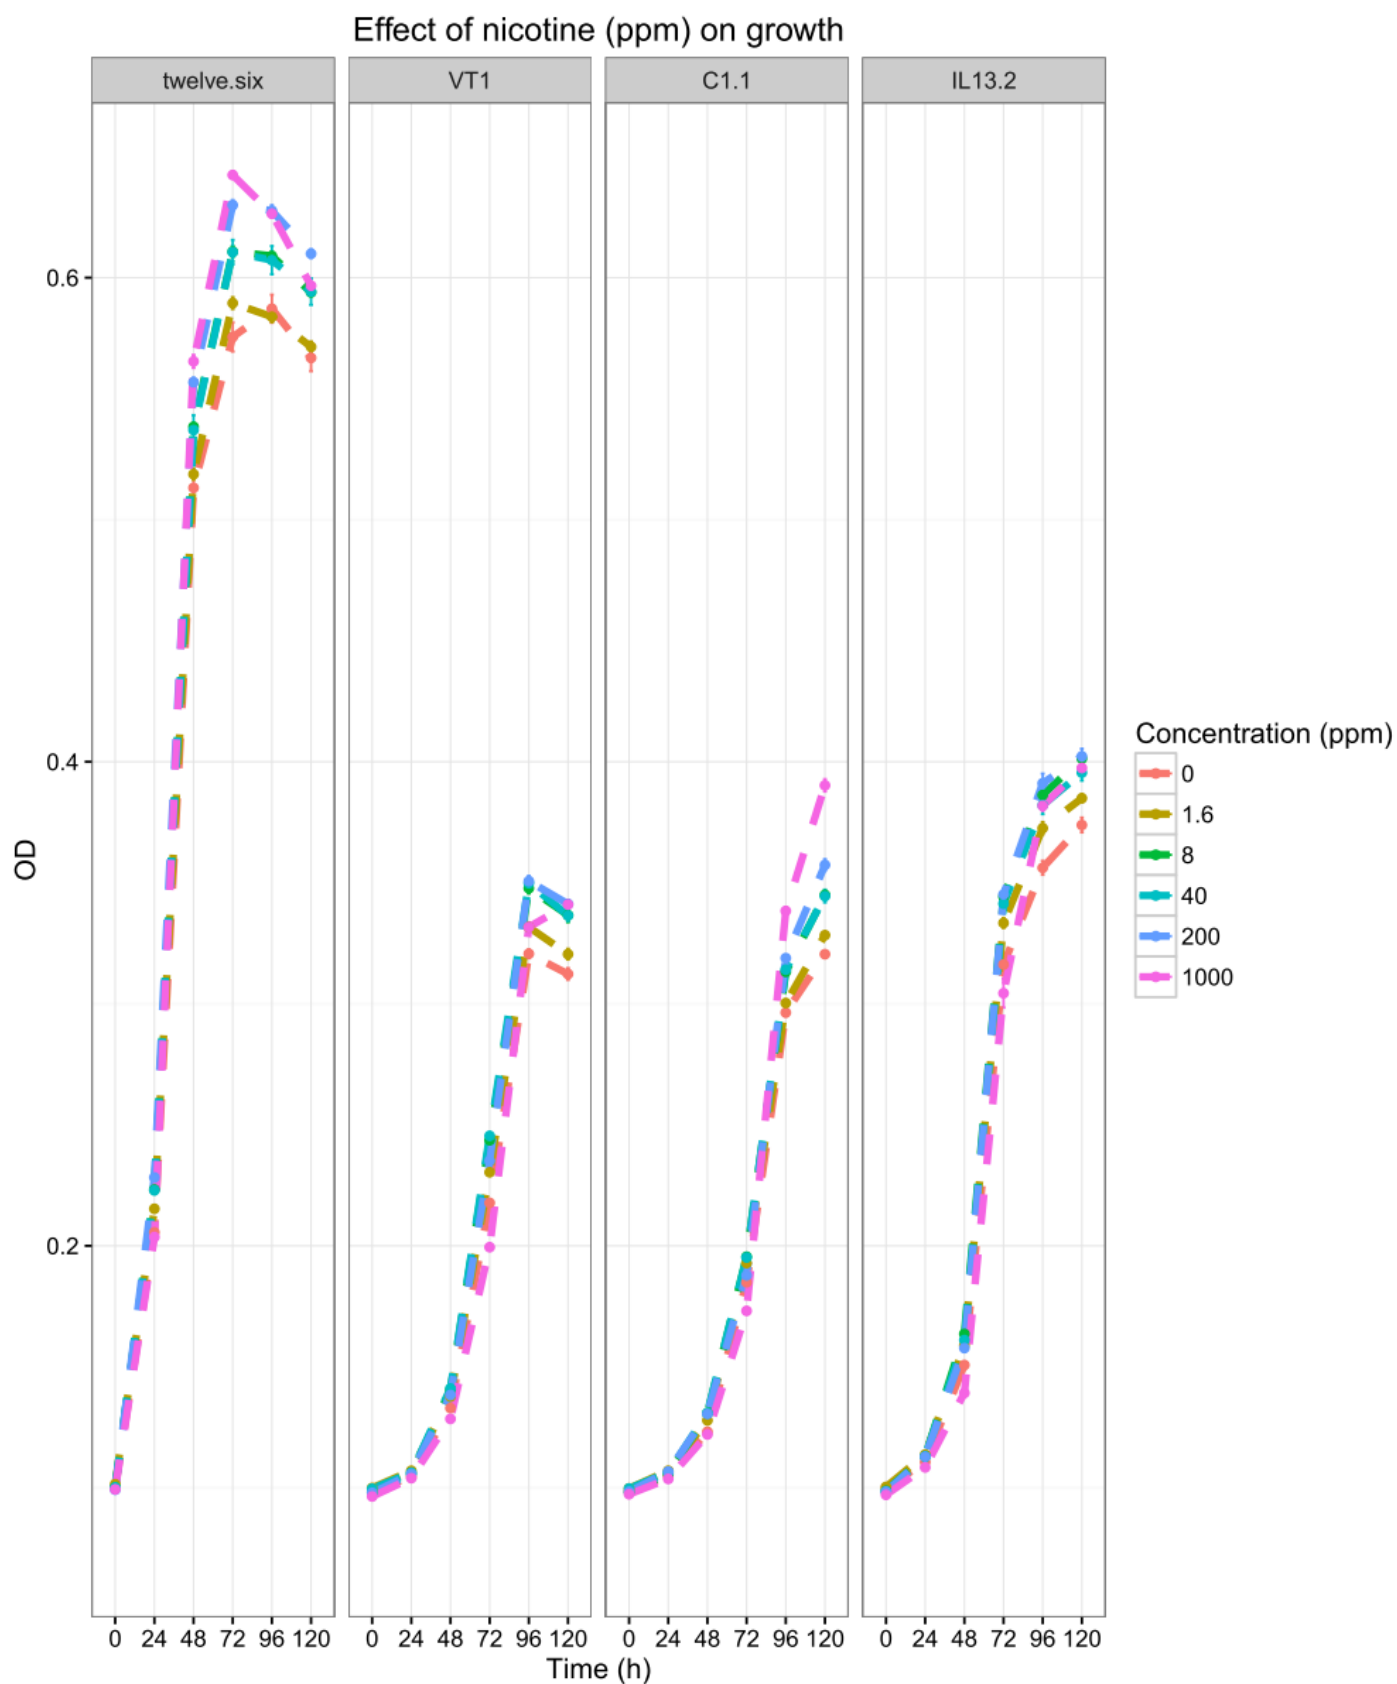

**Supplementary Figure S4. Representative growth curves** for four *C. bombi* strains in presence of non-inhibitory chemical nicotine. X axis shows time of measurement, Y axis shows optical density (OD 630 nm), points show mean  $\pm$  SD of 8 replicate wells. Lines are colored according to nicotine concentration.
